# Supplementary material for: Calcineurin subunit B is involved in shell regeneration in Haliotis diversicolor
Source: PeerJ. 2021 Jan 12;9:e10662. doi: 10.7717/peerj.10662 (PMC7810044; doi:10.7717/peerj.10662)
Supplement: Supplemental Information 1 — Raw data of qPCR and analysis of quantification cycle values (Cq) using the Livak method (2−ΔΔ Cq) at different time points (0, 3, 6, 12, 24, 36, 48 h) after shell notching. [file peerj-09-10662-s001.xlsx]

## Sheet: Sheet1
Raw data of HcCNA and HcCNB gene expressions after shell notching
HcCNA	Cq (mean)	dCq	ddCq	2^-ddCq	Mean expression	SD
0 h	19.55	3.91	0	1	1	0.45
	20.01	4.38	0	1
	19.98	4.8	0	1
3 h	19.63	4.46	0.1	0.94	1.01	0.11
	19.59	4.33	-0.03	1.02
	19.55	4.25	-0.11	1.08
6 h	19.75	4.19	-0.17	1.13	1.28	0.19
	19.37	4.04	-0.32	1.25
	19.34	3.82	-0.54	1.46
12 h	18.7	2.96	-1.4	2.65	2.5	0.16
	18.98	3.23	-1.13	2.19
	18.86	2.95	-1.41	2.66
24 h	20.11	3.25	-1.11	2.16	1.87	0.19
	20.17	3.57	-0.8	1.74
	20.16	3.59	-0.78	1.71
36 h	19.12	4.45	0.08	0.94	1.13	0.31
	19.04	3.87	-0.5	1.41
	19.25	4.32	-0.04	1.03
48 h	20.03	4.55	0.19	0.88	0.98	0.13
	19.99	4.34	-0.02	1.02
	19.86	4.3	-0.06	1.04
HcCNB	Cq (mean)	dCq	ddCq	2^-ddCq	Mean expression	SD
0 h	20.82	5.18	0	1	1	0.28
	20.42	4.79	0	1
	20.51	5.33	0	1
3 h	20.04	4.87	-0.23	1.17	1.19	0.09
	20.02	4.76	-0.34	1.27
	20.23	4.93	-0.17	1.13
6 h	18.54	2.98	-2.12	4.35	3.69	0.22
	18.65	3.32	-1.78	3.43
	18.9	3.38	-1.72	3.29
12 h	18.45	2.71	-2.39	5.24	6.12	0.26
	18.34	2.59	-2.51	5.7
	18.12	2.21	-2.89	7.41
24 h	19.43	2.57	-2.53	5.76	5.05	0.18
	19.53	2.93	-2.17	4.5
	19.38	2.81	-2.29	4.88
36 h	17.09	3.57	-1.53	2.88	2.73	0.63
	17.24	3.2	-1.9	3.73
	17.84	4.43	-0.67	1.59
48 h	19.23	4.56	-0.54	1.45	1.91	0.34
	19.07	3.9	-1.2	2.29
	19.04	4.11	-0.99	1.99
