# Supplementary material for: Calcineurin subunit B is involved in shell regeneration in Haliotis diversicolor
Source: PeerJ. 2021 Jan 12;9:e10662. doi: 10.7717/peerj.10662 (PMC7810044; doi:10.7717/peerj.10662)
Supplement: Supplemental Information 3 — Raw data of calcineurin enzymatic activity assay indicated the absorbance data (OD) that were converted into phosphate released (PO4). [file peerj-09-10662-s003.xlsx]

## Sheet: Sheet1
Calcineurin enzymatic activity assay
Reaction time	OD1	OD2	PO4(1)	PO4(2)	mean
10	0.101	0.103	0.044	0.069	0.056
30	0.103	0.105	0.056	0.081	0.069
40	0.106	0.11	0.075	0.113	0.094
60	0.117	0.115	0.144	0.144	0.144
90	0.128	0.13	0.213	0.238	0.225
